# Supplementary material for: Developing a Theoretically Informed Implementation Model for Telemedicine-Delivered Medication for Opioid Use Disorder: Qualitative Study With Key Informants
Source: PubMed Central journal article supplement (PMC10620637; doi:10.2196/47186), 2023-10-18

# Workflow process mapping to characterize the in-person delivery of medication for opioid use disorder

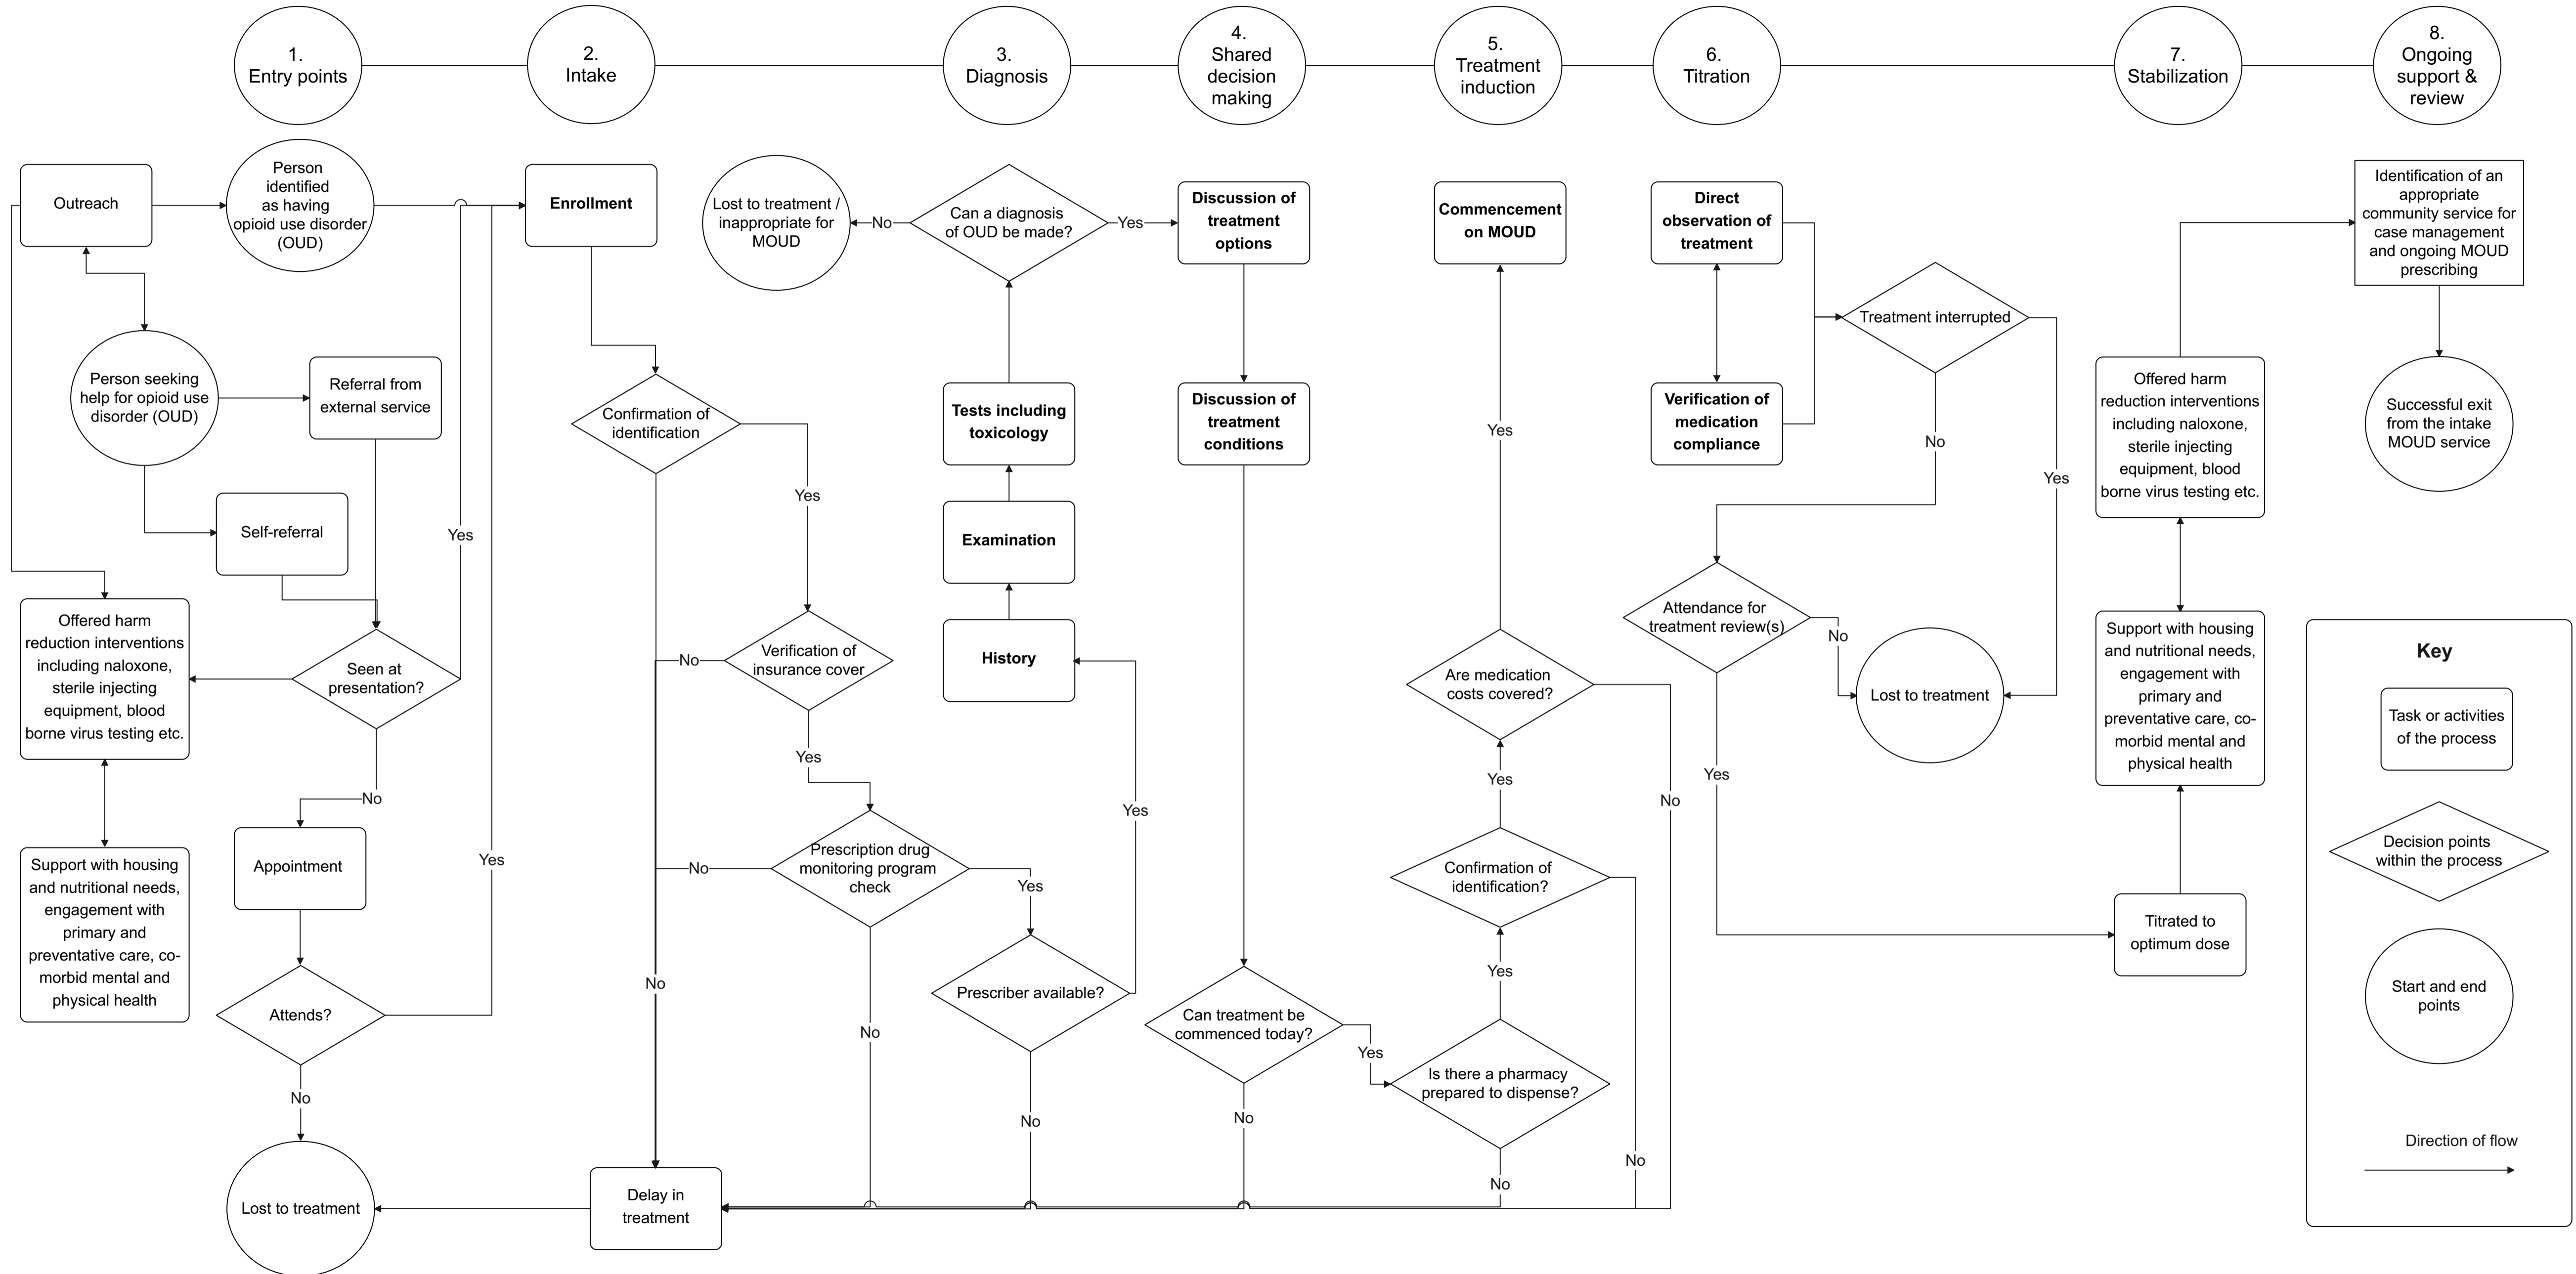

Supplement: mental_v10i1e47186_app10.pdf [file mental_v10i1e47186_app10.pdf]
